# Supplementary material for: Computational modelling and analytical validation of singular geometric effects in fault data using a combinatorial algorithm
Source: Copernicus journal article supplement (doi:10.5194/egusphere-2024-3327), 2025-01-08
Supplement: Supplementary file [file egusphere-2024-3327-AC3-supplement.pdf]

In this file, there are responses to the Reviewer#3 (Giacomo Medici, community comment).

We thank the Reviewer#3 for additional efforts and comments leading to improvement of figures.

### Responses to the Reviewer#3 (Community comment, Giacomo Medici)

1.

| Suggestion, Question, or Comment from the Reviewer#3 (community comment)                                                                                                    | Author's Response              | Change in the Manuscript |
|-----------------------------------------------------------------------------------------------------------------------------------------------------------------------------|--------------------------------|--------------------------|
| General comments<br><br>Very good geo-modelling research with a focus on representation of fault geometries. Please, follow my specific comments to improve the manuscript. | Thank you for your assessment. | Not applicable.          |

2.

| Suggestion, Question, or Comment from the Reviewer#3 (community comment)                   | Author's Response | Change in the Manuscript |
|--------------------------------------------------------------------------------------------|-------------------|--------------------------|
| Specific comments<br><br>Line 16. "Geometrical" better than "directional" for an abstract. | Agree             | Done.                    |

3.

| Suggestion, Question, or Comment from the Reviewer#3 (community comment)                                                                                        | Author's Response                                                                                                                              | Change in the Manuscript                                                                |
|-----------------------------------------------------------------------------------------------------------------------------------------------------------------|------------------------------------------------------------------------------------------------------------------------------------------------|-----------------------------------------------------------------------------------------|
| Line 32. Add other applications in the growing fields of geo-sciences of CO <sub>2</sub> storage and geothermal energy. Please, insert the following references | Agree/Clarification<br><br>We believe that the paper (doi: 10.3389/feart.2023.1328397) is relevant because, as a review article, it summarizes | We've added new citations in relation to geothermal energy and CO <sub>2</sub> storage. |

|                                                                                                                                                                                                                                                                                                                                                                                                                                                                      |                                                                                                                                                                                                                                                                                                                                                                                                                                                                                                                                                                                                                                                   |  |
|----------------------------------------------------------------------------------------------------------------------------------------------------------------------------------------------------------------------------------------------------------------------------------------------------------------------------------------------------------------------------------------------------------------------------------------------------------------------|---------------------------------------------------------------------------------------------------------------------------------------------------------------------------------------------------------------------------------------------------------------------------------------------------------------------------------------------------------------------------------------------------------------------------------------------------------------------------------------------------------------------------------------------------------------------------------------------------------------------------------------------------|--|
| <p>for the importance of faults in these two geo-energy fields:</p> <p>Geothermal energy: Medici, G., Ling, F., Shang, J. 2023. Review of discrete fracture network characterization for geothermal energy extraction. <i>Frontiers in Earth Science</i>, 11, 1328397.</p> <p>CO2 storage: Nicol, A., Seebeck, H., Field, B., McNamara, D., Childs, C., Craig, J., Rolland, A. 2017. Fault permeability and CO2 storage. <i>Energy Procedia</i>, 114, 3229-3236.</p> | <p>experimental techniques to characterize geometrical properties of subsurface aquifers which is relevant for geothermal applications. However, we would also need to cite at least one original article (<a href="https://doi.org/10.1016/j.geothermics.2022.102523">https://doi.org/10.1016/j.geothermics.2022.102523</a>).</p> <p>Regarding the second paper (doi: 10.1016/j.egypro.2017.03.1454), we believe that it is a conference paper or an extended abstract. Therefore, we decided to cite a full original paper instead (<a href="https://doi.org/10.1016/j.ijggc.2019.06.013">https://doi.org/10.1016/j.ijggc.2019.06.013</a>).</p> |  |
|----------------------------------------------------------------------------------------------------------------------------------------------------------------------------------------------------------------------------------------------------------------------------------------------------------------------------------------------------------------------------------------------------------------------------------------------------------------------|---------------------------------------------------------------------------------------------------------------------------------------------------------------------------------------------------------------------------------------------------------------------------------------------------------------------------------------------------------------------------------------------------------------------------------------------------------------------------------------------------------------------------------------------------------------------------------------------------------------------------------------------------|--|

4.

| Suggestion, Question, or Comment from the Reviewer#3 (community comment)                                                             | Author's Response                                                                                                                                                                                                                                                                                              | Change in the Manuscript                    |
|--------------------------------------------------------------------------------------------------------------------------------------|----------------------------------------------------------------------------------------------------------------------------------------------------------------------------------------------------------------------------------------------------------------------------------------------------------------|---------------------------------------------|
| <p>Line 50. Clearly state the 3 to 4 specific objectives of your geo-modelling research by using numbers (e.g., i, ii, and iii).</p> | <p><b>Agree/Clarification</b></p> <p>Honestly, we have rather two main objectives: analyzing case studies for data with and without uncertainties. Of course, we could add a third bullet point with the analysis of GEBCO data, but this is rather a discussion of implications of the previous analyses.</p> | <p>We've highlighted two bullet points.</p> |

5.

| Suggestion, Question, or Comment from the Reviewer#3 (community comment) | Author's Response                                                                                                                          | Change in the Manuscript                                      |
|--------------------------------------------------------------------------|--------------------------------------------------------------------------------------------------------------------------------------------|---------------------------------------------------------------|
| Page 6. I can see several equations without numbers associated with.     | <b>Clarification</b><br><br>Some minor formulas don't have numbers. If the Editor will require additional numbers, we will introduce them. | None, as of now, but can be added upon the Editor's request.. |

6.

| Suggestion, Question, or Comment from the Reviewer#3 (community comment)                                                                 | Author's Response | Change in the Manuscript                                                                                                      |
|------------------------------------------------------------------------------------------------------------------------------------------|-------------------|-------------------------------------------------------------------------------------------------------------------------------|
| Lines 281-294. This part of the discussion shows paucity of literature. I suggest to back-up your statements with supporting literature. | <b>Agree</b>      | We've added three references to the section 5.1: two textbooks as a support for general definitions and one historical paper. |

7.

| Suggestion, Question, or Comment from the Reviewer#3 (community comment)      | Author's Response                                                                                                                                                                                                                                                                                                                  | Change in the Manuscript                                                                                                                                |
|-------------------------------------------------------------------------------|------------------------------------------------------------------------------------------------------------------------------------------------------------------------------------------------------------------------------------------------------------------------------------------------------------------------------------|---------------------------------------------------------------------------------------------------------------------------------------------------------|
| Line 362. Add a "take home message" for the researchers working in the field. | <b>Clarification</b><br><br>We are not sure which field is the Reviewer referring to (structural geologists, bathymetric geomorphologists). The conclusions can be mostly useful for researchers working explicitly with triangulated surfaces or implicitly: in the form of performing directional analyses of surfaces (azimuth, | We've added a general statement before the bullet points.<br><br>We've improved the first bullet point of the Conclusion because it was not very clear. |

|  |                                               |  |
|--|-----------------------------------------------|--|
|  | maps) that use triangulations under the hood. |  |
|--|-----------------------------------------------|--|

8.

| Suggestion, Question, or Comment from the Reviewer#3 (community comment)                                                                                              | Author's Response | Change in the Manuscript                                                                                                                                                             |
|-----------------------------------------------------------------------------------------------------------------------------------------------------------------------|-------------------|--------------------------------------------------------------------------------------------------------------------------------------------------------------------------------------|
| <p>Figures and tables</p> <p>Figure 3. You can make the four diagrams closer, gain space and enlarge the overall image. The four blocks are difficult to analyse.</p> | <p>Agree</p>      | <p>We've reduced the space between four diagrams and enlarged the image.</p> <p>Moreover, we've made the background less dark according to the request of the Editorial support.</p> |

9.

| Suggestion, Question, or Comment from the Reviewer#3 (community comment)                           | Author's Response                                                                                                                                                                                                                                                                                                                                                                                         | Change in the Manuscript |
|----------------------------------------------------------------------------------------------------|-----------------------------------------------------------------------------------------------------------------------------------------------------------------------------------------------------------------------------------------------------------------------------------------------------------------------------------------------------------------------------------------------------------|--------------------------|
| <p>Figure 4c. This is a conceptually different image. It should represent a separate Figure 5.</p> | <p>Clarification/Disagree</p> <p>Although Figure 4c might appear conceptually different at first glance, it is intentionally placed as part of Figure 4 because it directly corresponds to the triangle orientations shown above. Separating it into a new figure would break this link and make it harder for the reader to associate the triangle geometry with the resulting directional patterns.</p> | <p>None.</p>             |

10.

| Suggestion, Question, | Author's Response | Change in the Manuscript |
|-----------------------|-------------------|--------------------------|
|-----------------------|-------------------|--------------------------|

| or Comment from the Reviewer#3 (community comment)                                                          |                                                                                                                                                                           |                                                                         |
|-------------------------------------------------------------------------------------------------------------|---------------------------------------------------------------------------------------------------------------------------------------------------------------------------|-------------------------------------------------------------------------|
| Figure 6c and d. Same issue here. These are very different images. They should represent a separate figure. | <p><b>Clarification</b></p> <p>See our response to comment #9.</p> <p>However, we realize that the caption did not include all information to see the correspondence.</p> | We've improved the caption to Fig. 6 to show the direct correspondence. |

11.

| Suggestion, Question, or Comment from the Reviewer#3 (community comment)           | Author's Response | Change in the Manuscript |
|------------------------------------------------------------------------------------|-------------------|--------------------------|
| Figure 7c. Improve the graphical resolution of the Figure 7c which is a stereonet. | <b>Agree</b>      | Done.                    |

#### Other changes:

We had a bug in the code in relation to the sample circular dispersion (there was  $m_2^2$  but it should be just  $m_2$ ). The code and the tabulated results have been revised accordingly.

According to the request of the Editorial support (Mrs Daria Karpachova), we've made the background of selected figures (1, 3, 4 and 5) less dark.
